# Supplementary material for: Effect of potassium precursors on the thermal stability of K-promoted Ru/carbon catalysts for ammonia synthesis
Source: Royal Society of Chemistry journal article supplement (doi:10.1039/c5cy00014a), 2015-01-01
Supplement: c5cy00014a1.pdf [file c5cy00014a1.pdf]

## **Supporting Information**

### **Deactivation study of K promoted Ru/carbon catalyst for ammonia synthesis**

Bingyu Lin\*, Yanchao Qi, Yunjie Guo, Jianxin Lin, Jun Ni

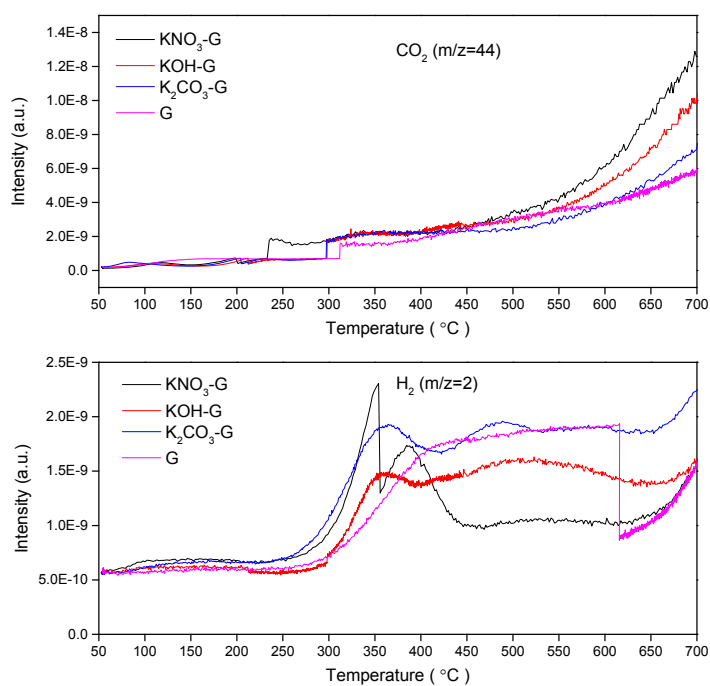

Fig. S1 CO-TPR profiles of carbon (G), and carbon doped with different K precursors (KNO<sub>3</sub>-G, KOH-G and K<sub>2</sub>CO<sub>3</sub>-G)

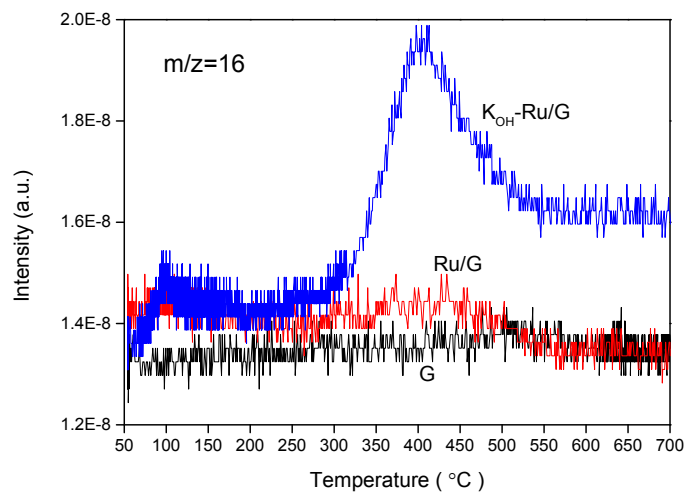

Fig. S2 The mass spectrum with  $m/z = 16$  for G, Ru/G and  $K_{OH}$ -Ru/G obtained from CO-TPR study.

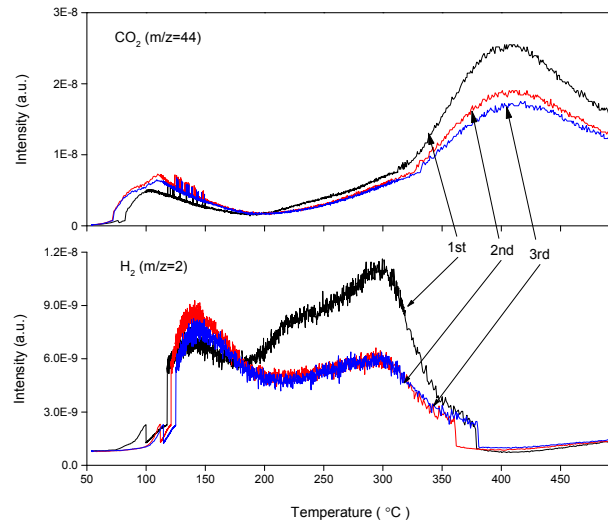

Fig. S3 CO-TPR profiles for  $\text{K}_{\text{OH}}\text{-Ru/G}$ . Rehydration by hydrogen reduction the sample at 500 °C between consecutive cycles.

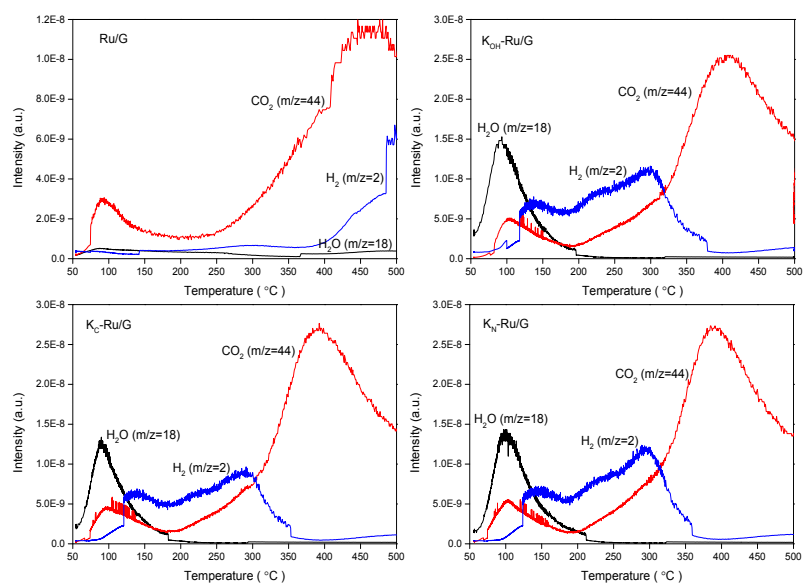

Fig. S4 CO-TPR profiles for unpromoted Ru/G and K-promoted Ru/G catalysts.

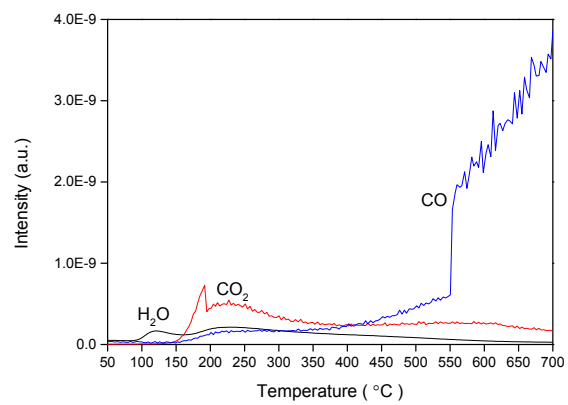

Fig. S5 Ar-TPD profiles of commercial carbon.

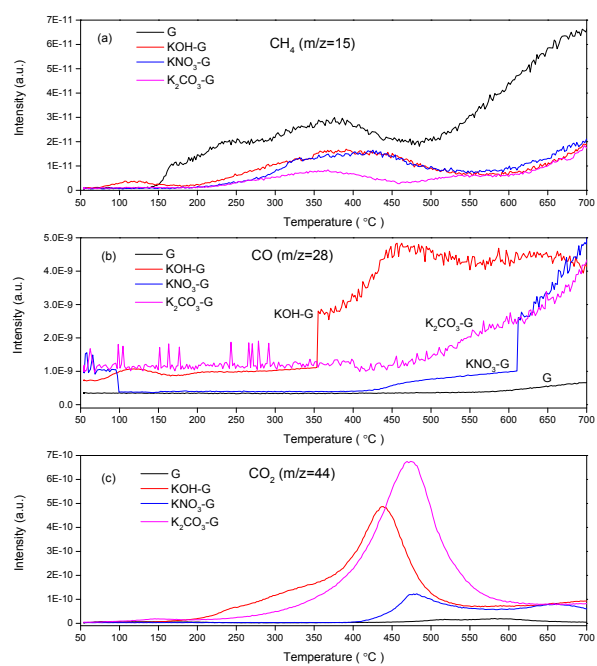

Fig. S6 H<sub>2</sub>-TPR profiles of carbon and K-doped carbon materials with hydrogen reduction (a) CH<sub>4</sub> (m/z=15), (b) CO (m/z=28) and (c) CO<sub>2</sub> (m/z=44).

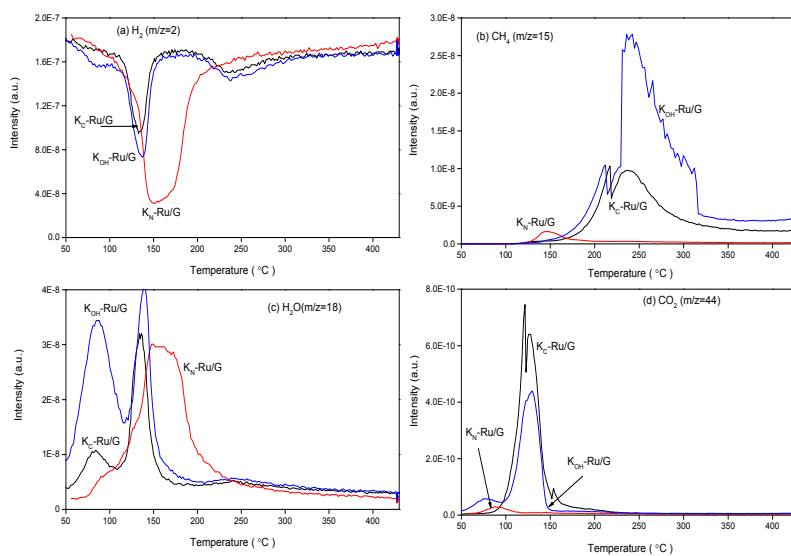

Fig. S7  $H_2$ -TPR profiles of K-promoted Ru/G catalysts without hydrogen treatment.



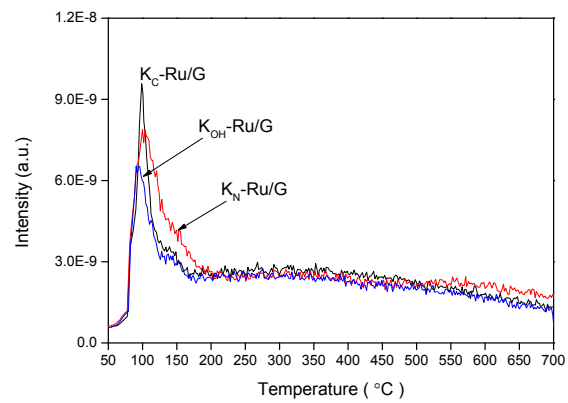

Fig. S8 The mass spectrum with  $m/z = 18$  of  $K_{OH}$ -Ru/G,  $K_C$ -Ru/G and  $K_N$ -Ru/G obtained from CO-TPR study.

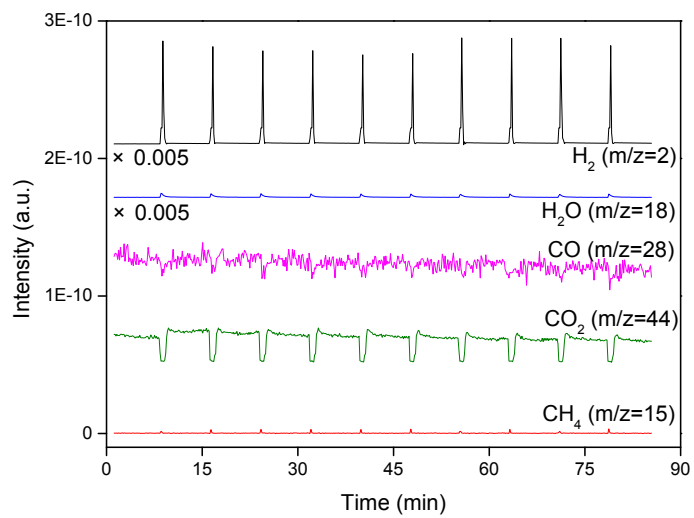

Fig. S9 H<sub>2</sub> pulse chemisorption results at 400 °C over blank sample

Table S1 The peak areas of hydrogen obtained from mass spectroscopy during H<sub>2</sub> pulse

chemisorption

| Pulse number | Sample       |                             |                                                  |                                                  |
|--------------|--------------|-----------------------------|--------------------------------------------------|--------------------------------------------------|
|              | Blank sample | Fresh K <sub>OH</sub> -Ru/G | K <sub>OH</sub> -Ru/G treated at 400 °C for 20 h | K <sub>OH</sub> -Ru/G treated at 500 °C for 20 h |
| 1            | 3.50E-09     | 1.50E-09                    | 1.69E-09                                         | 1.06E-09                                         |
| 2            | 2.80E-09     | 1.74E-09                    | 2.33E-09                                         | 3.00E-09                                         |
| 3            | 2.83E-09     | 2.03E-09                    | 1.85E-09                                         | 1.86E-09                                         |
| 4            | 2.84E-09     | 6.08E-09                    | 3.13E-09                                         | 1.82E-09                                         |
| 5            | 2.86E-09     | 3.17E-09                    | 5.28E-09                                         | 1.88E-09                                         |
| 6            | 2.87E-09     | 2.32E-09                    | 4.08E-09                                         | 1.92E-09                                         |
| 7            | 3.52E-09     | 6.71E-09                    | 5.55E-09                                         | 3.91E-09                                         |
| 8            | 2.91E-09     | 4.12E-09                    | 3.58E-09                                         | 3.01E-09                                         |
| 9            | 3.85E-09     | 2.19E-09                    | 5.56E-09                                         | 2.36E-09                                         |
| 10           | 2.90E-09     | 6.03E-09                    | 3.15E-09                                         | 1.75E-09                                         |
| Average area | 3.09E-09     | 3.59E-09                    | 3.62E-09                                         | 2.26E-09                                         |
